# Supplementary material for: One- and two-photon absorption spectra of organoboron complexes: vibronic and environmental effects
Source: Royal Society of Chemistry journal article supplement (doi:10.1039/d4cp01089b), 2024-01-01
Supplement: d4cp01089b1.pdf [file d4cp01089b1.pdf]

# One- and two-photon absorption spectra of organoboron complexes: Vibronic and environmental effects

## SUPPORTING INFORMATION

Elizaveta F. Petrushevich,<sup>a</sup> Heribert Reis,<sup>b</sup> Borys Ośmiałowski,<sup>c</sup> Denis Jacquemin,<sup>d,e</sup>  
Josep M. Luis,<sup>\*,f</sup> Robert Zalesny<sup>\*,a</sup>

<sup>a</sup> Faculty of Chemistry, Wrocław University of Science and Technology, Wybrzeże Wyspiańskiego 27,  
50-370 Wrocław, Poland

<sup>b</sup> Institute of Chemical Biology, National Hellenic Research Foundation (NHRF), Vassileos Constantinou  
Ave 48th, 116 35 Athens, Greece

<sup>c</sup> Faculty of Chemistry, Nicolaus Copernicus University, Gagarina 7, PL-87100 Toruń, Poland

<sup>d</sup> Nantes Université, CNRS, CEISAM UMR 6230, F-44000 Nantes, France

<sup>e</sup> Institut Universitaire de France (IUF), F-75005 Paris, France

<sup>f</sup> Institute of Computational Chemistry and Catalysis and Department of Chemistry, University of Girona,  
Campus de Montilivi, 17003, Girona, Catalonia, Spain

\*E-mail: josepm.luis@udg.edu (J.M.L.), robert.zalesny@pwr.edu.pl (R.Z.)

Table S1: Vibrational reorganization energies of the studied compounds in chloroform. Unsigned relative errors were calculated with respect to the EOM-CCSD reference values.

|                 | vibrational reorganization energies, $\text{cm}^{-1}$ |          |          |          | unsigned relative error, % |          |          |          | MAPE, % |
|-----------------|-------------------------------------------------------|----------|----------|----------|----------------------------|----------|----------|----------|---------|
|                 | <b>1</b>                                              | <b>2</b> | <b>3</b> | <b>4</b> | <b>1</b>                   | <b>2</b> | <b>3</b> | <b>4</b> |         |
| B3LYP           | 1788.45                                               | 1367.46  | 1756.52  | 2199.26  | 30.43                      | 26.30    | 11.90    | 43.90    | 28.13   |
| BH&HLYP         | 2256.67                                               | 1743.56  | 2383.81  | 2574.51  | 12.22                      | 6.03     | 19.55    | 34.33    | 18.03   |
| BLYP            | 2904.51                                               | 1456.64  | 1432.15  | 2015.88  | 12.97                      | 21.49    | 28.17    | 48.58    | 27.80   |
| CAM-B3LYP       | 2132.44                                               | 1579.18  | 2113.33  | 2384.41  | 17.05                      | 14.89    | 5.99     | 39.18    | 19.28   |
| LC-BLYP         | 2592.81                                               | 2201.66  | 2674.41  | 2707.15  | 0.85                       | 18.65    | 34.13    | 30.95    | 21.14   |
| M06-2X          | 2407.94                                               | 1673.00  | 2218.73  | 2473.94  | 6.33                       | 9.83     | 11.28    | 36.89    | 16.08   |
| M06-HF          | 3170.19                                               | 2486.97  | 2975.31  | 2891.81  | 23.31                      | 34.03    | 49.22    | 26.24    | 33.20   |
| MN15            | 2142.16                                               | 1463.06  | 2013.57  | 2390.40  | 16.67                      | 21.15    | 0.99     | 39.03    | 19.46   |
| PBE0            | 1894.97                                               | 1356.41  | 1811.61  | 2243.19  | 26.29                      | 26.89    | 9.13     | 42.78    | 26.27   |
| $\omega$ B97X   | 2299.44                                               | 1818.14  | 2294.04  | 2483.09  | 10.55                      | 2.01     | 15.05    | 36.66    | 16.07   |
| $\omega$ B97X-D | 2066.11                                               | 1540.42  | 2033.87  | 2334.40  | 19.63                      | 16.98    | 2.00     | 40.45    | 19.77   |
| EOM-CCSD        | 2570.87                                               | 1855.50  | 1993.82  | 3920.63  |                            |          |          |          |         |

Table S2: Photophysical properties calculated at the IEF-PCM( $\text{CHCl}_3$ )/LC-BLYP/cc-pVDZ level of theory using the vertical approximation. Absorption wavelength  $\lambda_{\text{abs}}$ , excitation energy  $E_{\text{abs}}$ , and oscillator strength  $f$  are listed. Values given in brackets correspond to experimental measurements.

|            | $S_0 \rightarrow S_1$       |                                     |       |
|------------|-----------------------------|-------------------------------------|-------|
|            | $\lambda_{\text{abs}}$ , nm | $E_{\text{abs}}$ , $\text{cm}^{-1}$ | $f$   |
| <b>1</b>   | 262 (307)                   | 38170 (32570)                       | 0.39  |
| <b>2</b>   | 283 (339)                   | 35340 (29500)                       | 0.54  |
| <b>3</b>   | 284 (343)                   | 35210 (29150)                       | 0.37  |
| <b>4</b>   | 301 (368)                   | 33220 (27170)                       | 0.21  |
|            | $S_0 \rightarrow S_2$       |                                     |       |
|            | $\lambda_{\text{abs}}$ , nm | $E_{\text{abs}}$ , $\text{cm}^{-1}$ | $f$   |
| <b>F-1</b> | 224                         | 44640                               | <0.01 |
| <b>F-2</b> | 248                         | 40320                               | 0.06  |
| <b>F-3</b> | 241                         | 41490                               | 0.18  |
| <b>F-4</b> | 260                         | 38460                               | 0.49  |

Table S3: Linear regression equations and the corresponding determination coefficient,  $R^2$ , obtained with the machine learning approach (Fig. 6).

|          | equation              | $R^2$ |
|----------|-----------------------|-------|
| <b>1</b> | $y = 1.002x - 69.0$   | 0.94  |
| <b>2</b> | $y = 0.918x + 2623.9$ | 0.79  |
| <b>3</b> | $y = 0.858x + 4539.1$ | 0.86  |
| <b>4</b> | $y = 1.018x - 521.6$  | 0.97  |

- Molecule 1: (Z)-[1-(Difluoroboryloxy)ethylidene]-2-pyridylamine,  $^1\text{H}$  NMR (700MHz,  $\text{CDCl}_3$ )  $\delta$ : 8.30 (m, 1H), 8.07 (ddd, 1H,  $J=8.4, 7.4, 1.8$  Hz, 1H), 7.39 (ddd, 1H,  $J=7.4, 6.0, 1.3$ ), 7.36 (d, 1H,  $J=8.4$ ), 2.33 (s, 3H).  $^{13}\text{C}$  NMR ( $\text{CDCl}_3$ )  $\delta$ : 171.6, 153.9, 144.0, 138.5, 122.7, 120.8, 23.6,  $^{11}\text{B}$  NMR ( $\text{CDCl}_3$ )  $\delta$ : 0.41 (t,  $J=13.7$  Hz),  $^{15}\text{N}$  NMR ( $\text{CDCl}_3$ )  $\delta$ : -175.4, -169.4. Mp.=137.7-139.0 °C.
- Molecule 2: (Z)-[1-(Difluoroboryloxy)ethylidene]-2-quinolylamine,  $^1\text{H}$  NMR (700MHz,  $\text{CDCl}_3$ )  $\delta$ : 8.58 (dt, 1H,  $J=8.8, 2.9, 0.8$ ), 8.38 (dd, 1H,  $J=8.8, 0.4$ ), 7.84 (m, 2H), 7.62 (ddd, 1H,  $J=8.1, 7.1, 0.9$ ), 7.34 (d, 1H,  $J=8.8$  Hz), 2.41 (s, 3H).  $^{13}\text{C}$  NMR ( $\text{CDCl}_3$ )  $\delta$ : 173.4, 155.2, 144.5, 137.9, 137.9, 132.8, 128.6, 127.4, 126.6, 123.0, 120.9, 23.5.  $^{11}\text{B}$  NMR  $\delta$ : 1.16 (t,  $J=16.2$  Hz).  $^{15}\text{N}$  NMR  $\delta$ : -173.0. Mp = 208-209.5 °C.
- Molecule 3: (Z)-[1-(Difluoroboryloxy)ethylidene]-1-isoquinolylamine,  $^1\text{H}$  NMR (700MHz,  $\text{CDCl}_3$ )  $\delta$ : 8.94 (ddt, 1H,  $J=8.4, 1.4, 0.8$  Hz), 8.03 (dd, 1H,  $J=6.7, 2.4$  Hz), 7.93 (ddd, 1H,  $J=8.2, 6.9, 1.3$  Hz), 7.86 (dt, 1H,  $J=8.1\text{Hz}, 0.8$  Hz), 7.77 (ddd, 1H,  $J=8.3, 6.9, 1.3\text{Hz}$ ), 7.62 (dd, 1H,  $J=6.8, 0.8$  Hz), 2.47 (s, 3H).  $^{13}\text{C}$  NMR ( $\text{CDCl}_3$ )  $\delta$ : 173.4, 154.3, 138.2, 134.5, 129.5, 129.1, 128.1, 126.5, 124.1, 119.1, 24.2.  $^{11}\text{B}$  NMR  $\delta$ : 0.72 ( $J=14.2$  Hz).  $^{15}\text{N}$  NMR ( $\text{CDCl}_3$ )  $\delta$ : -191.1, -175.5. Mp.= 194-194 °C.
- Molecule 4: (Z)-[1-(Difluoroboryloxy)ethylidene]-3-isoquinolylamine,  $^1\text{H}$  NMR (700MHz,  $\text{CDCl}_3$ )  $\delta$ : 9.17 (s, 1H), 8.10 (dd, 1H,  $J=8.4$  Hz, 0.8 Hz), 7.93 (dd, 1H,  $J=8.5, 0.5$  Hz), 7.88 (ddd, 1H,  $J=8.5, 6.7$  Hz, 1.2 Hz), 7.75 (s, 1H), 7.68 (ddd, 1H,  $J=8.4, 6.7, 1.2$  Hz), 2.36 (s, 3H),  $^{13}\text{C}$  NMR ( $\text{CDCl}_3$ )  $\delta$ : 168.1, 146.5, 143.7, 140.7, 134.9, 129.3, 128.5, 126.9, 125.7, 117.4, 23.5.  $^{11}\text{B}$  NMR  $\delta$ : 0.65 (t,  $J=14.1$  Hz).  $^{15}\text{N}$  NMR  $\delta$ : -179.1, -173.0. Mp.= 185.5 - 187 °C.

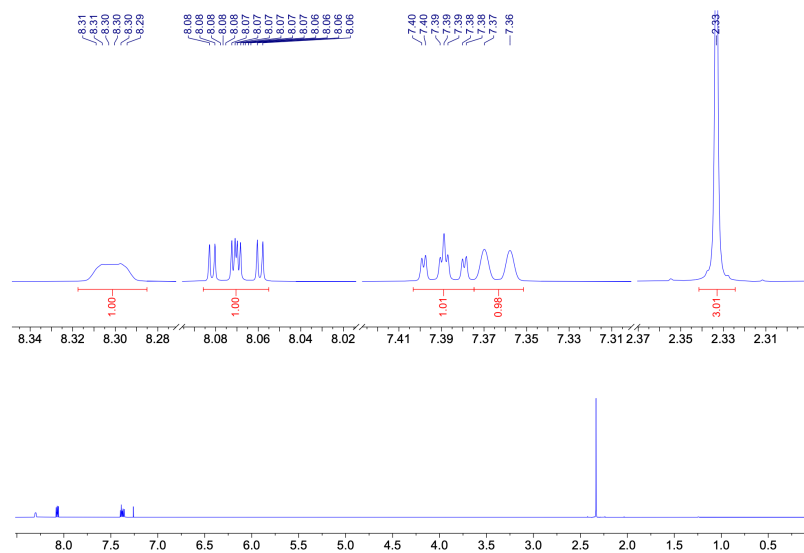

Figure S1:  $^1\text{H}$  NMR spectrum for compound **1**.

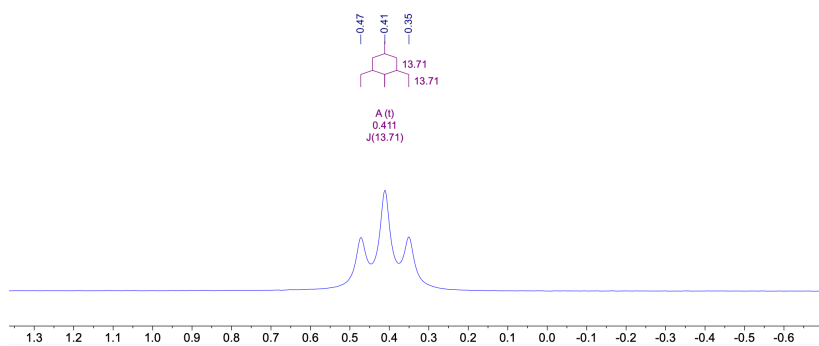

Figure S2:  $^{11}\text{B}$  NMR spectrum for compound **1**.

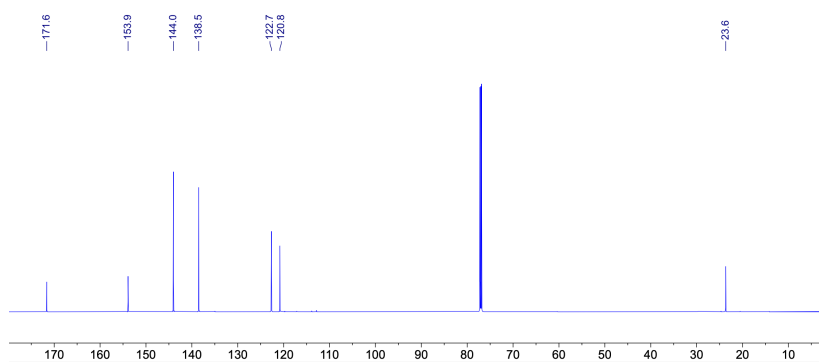

Figure S3:  $^{13}\text{C}$  NMR spectrum for compound **1**.

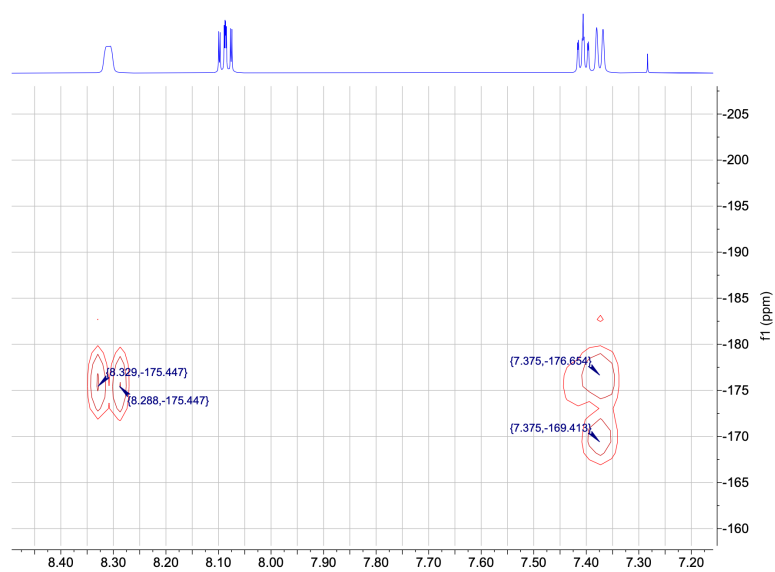

Figure S4:  $^1\text{H}$ ,  $^{15}\text{N}$  HMBC NMR spectrum for compound **1**.

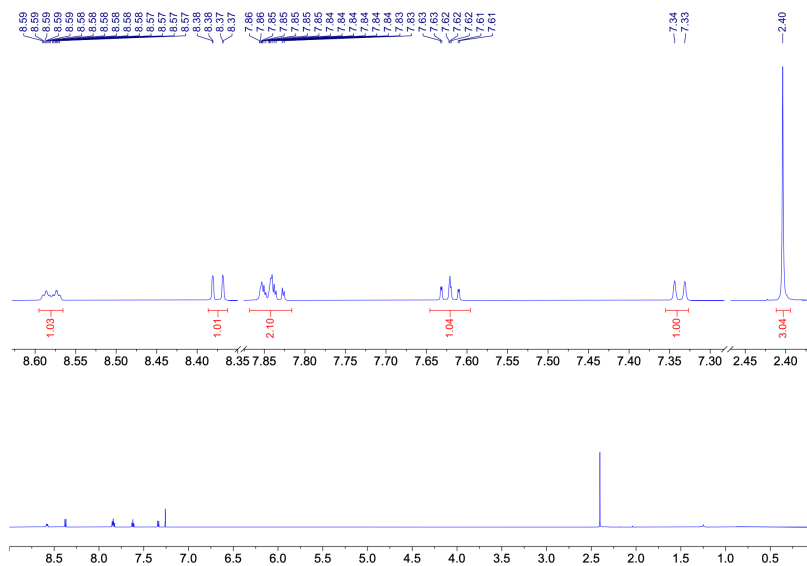

Figure S5:  $^1\text{H}$  NMR spectrum for compound **2**.

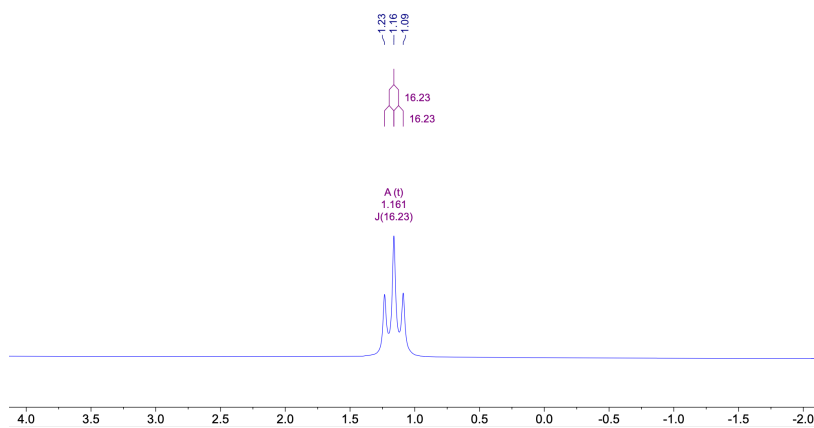

Figure S6:  $^{11}\text{B}$  NMR spectrum for compound **2**.

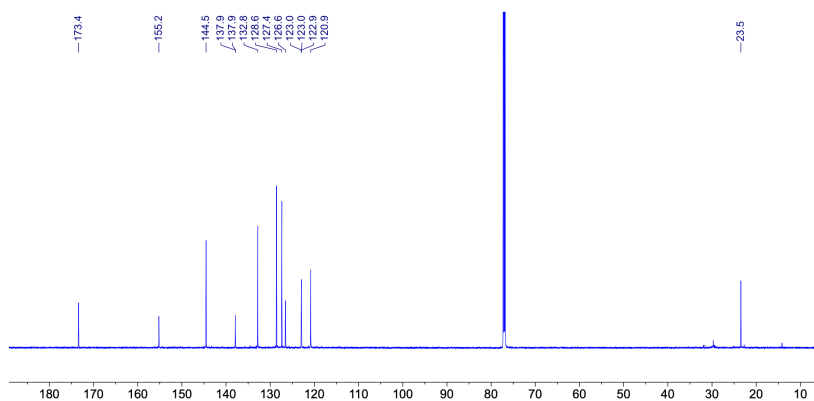

Figure S7:  $^{13}\text{C}$  NMR spectrum for compound **2**.

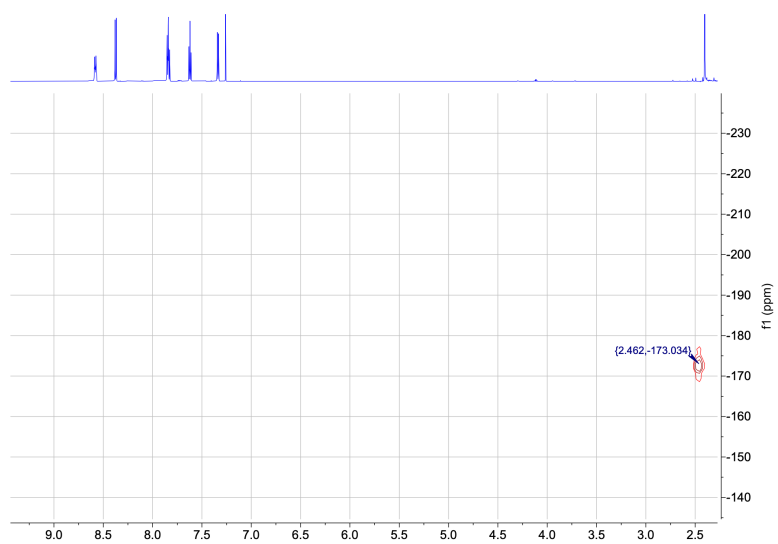

Figure S8:  $^1\text{H}$ ,  $^{15}\text{N}$  HMBC NMR spectrum for compound **2**.



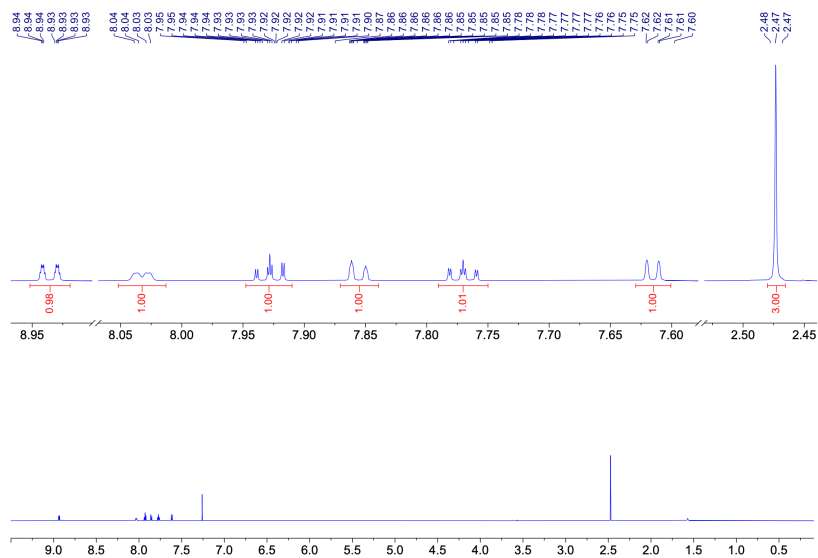

Figure S9:  $^1\text{H}$  NMR spectrum for compound **3**.

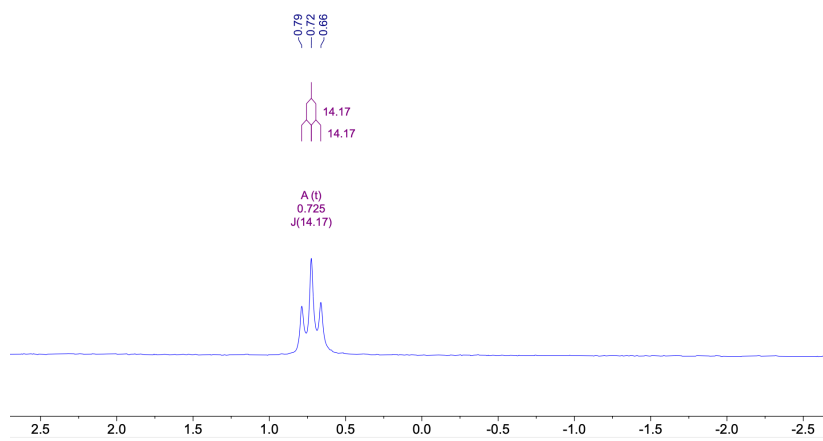

Figure S10:  $^{11}\text{B}$  NMR spectrum for compound **3**.

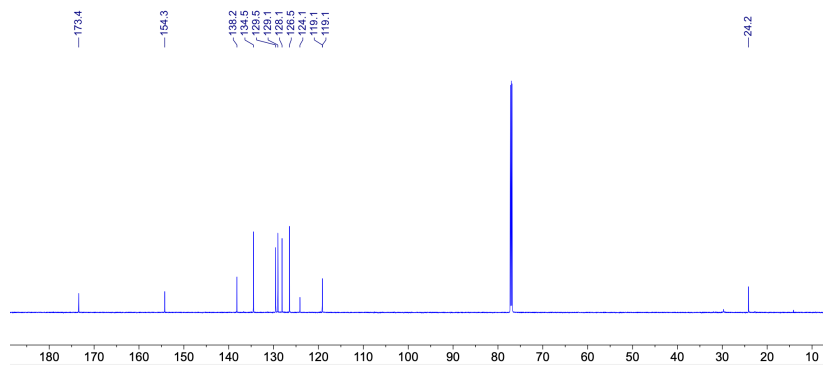

Figure S11:  $^{13}\text{C}$  NMR spectrum for compound **3**.



Figure S12:  $^1\text{H}$ ,  $^{15}\text{N}$  HMBC NMR spectrum for compound 3.

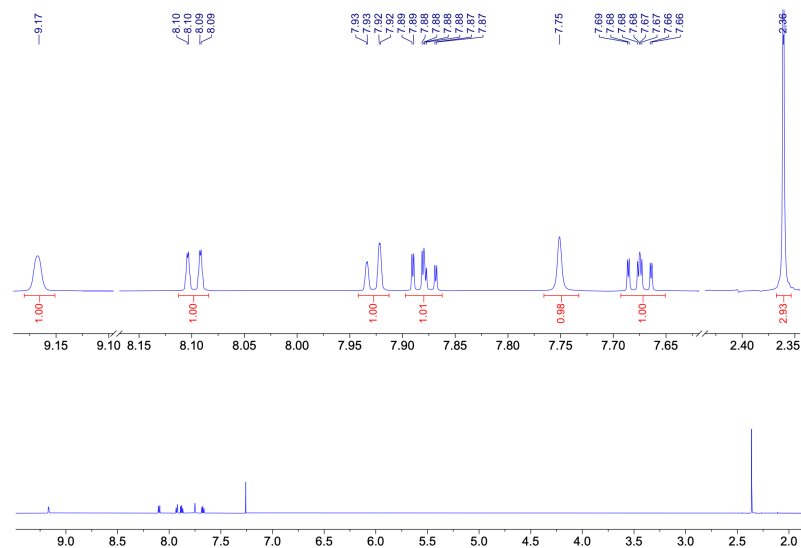

Figure S13:  $^1\text{H}$  NMR spectrum for compound **4**.

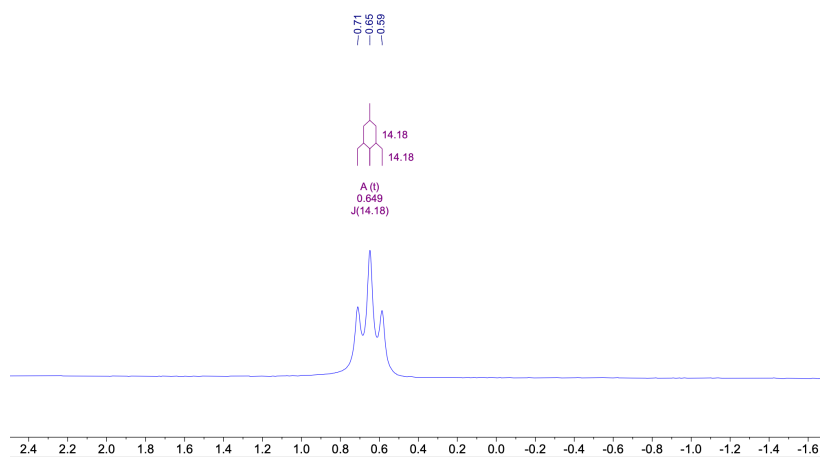

Figure S14:  $^{11}\text{B}$  NMR spectrum for compound **4**.

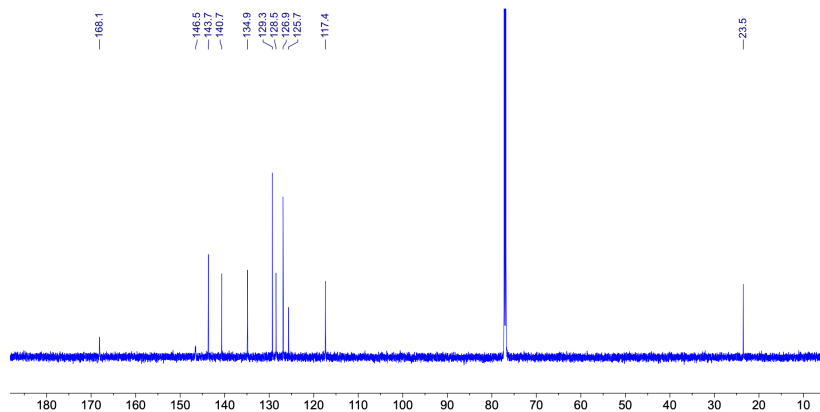

Figure S15:  $^{13}\text{C}$  NMR spectrum for compound **4**.

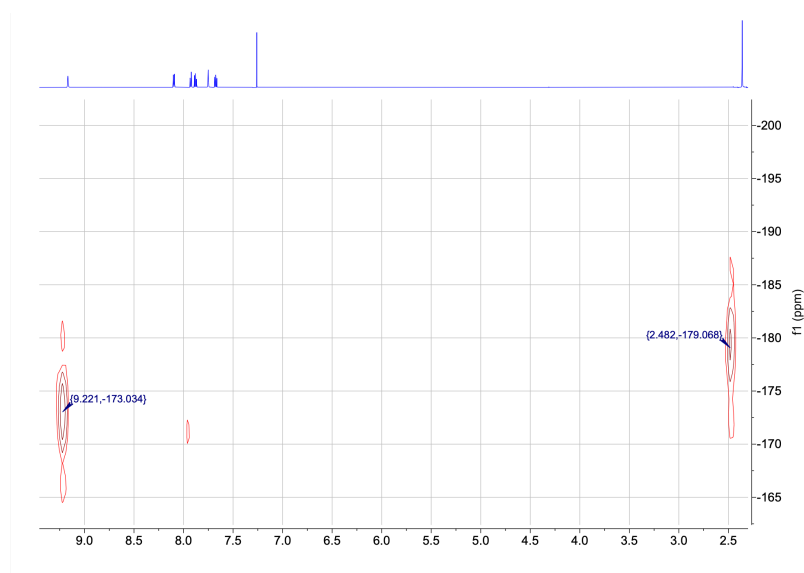

Figure S16:  $^1\text{H}$ ,  $^{15}\text{N}$  HMBC NMR spectrum for compound **4**.

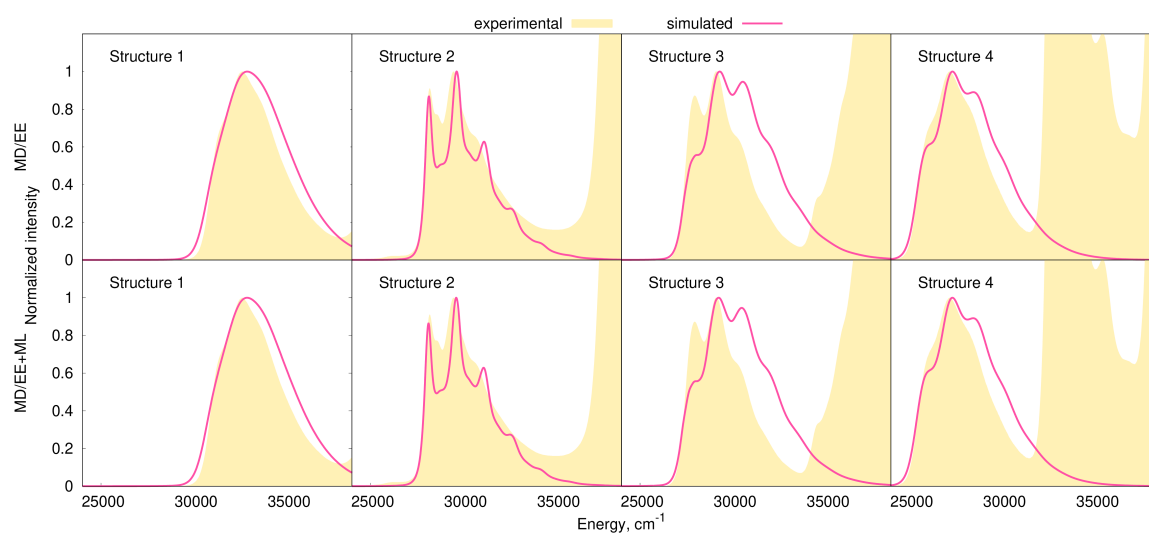

Figure S17: Vibronic absorption spectra of the investigated dyes in chloroform, at 298 K, computed using FC theory in the TD formalism combined with the AH vibrational space, and convoluted with an inhomogeneous broadening computed by EE (first row) and ML (second row) approaches.

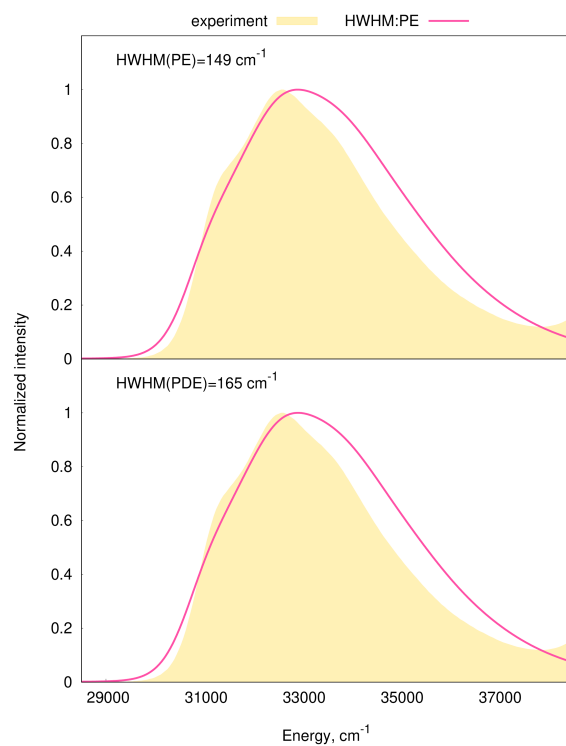

Figure S18: Comparison between the spectra simulated with PE and PDE&PE inhomogeneous broadenings for compound **1**. LC-BLYP electronic structure calculations in chloroform (IEF-PCM), AH vibrational space, TD formalism, 298 K.

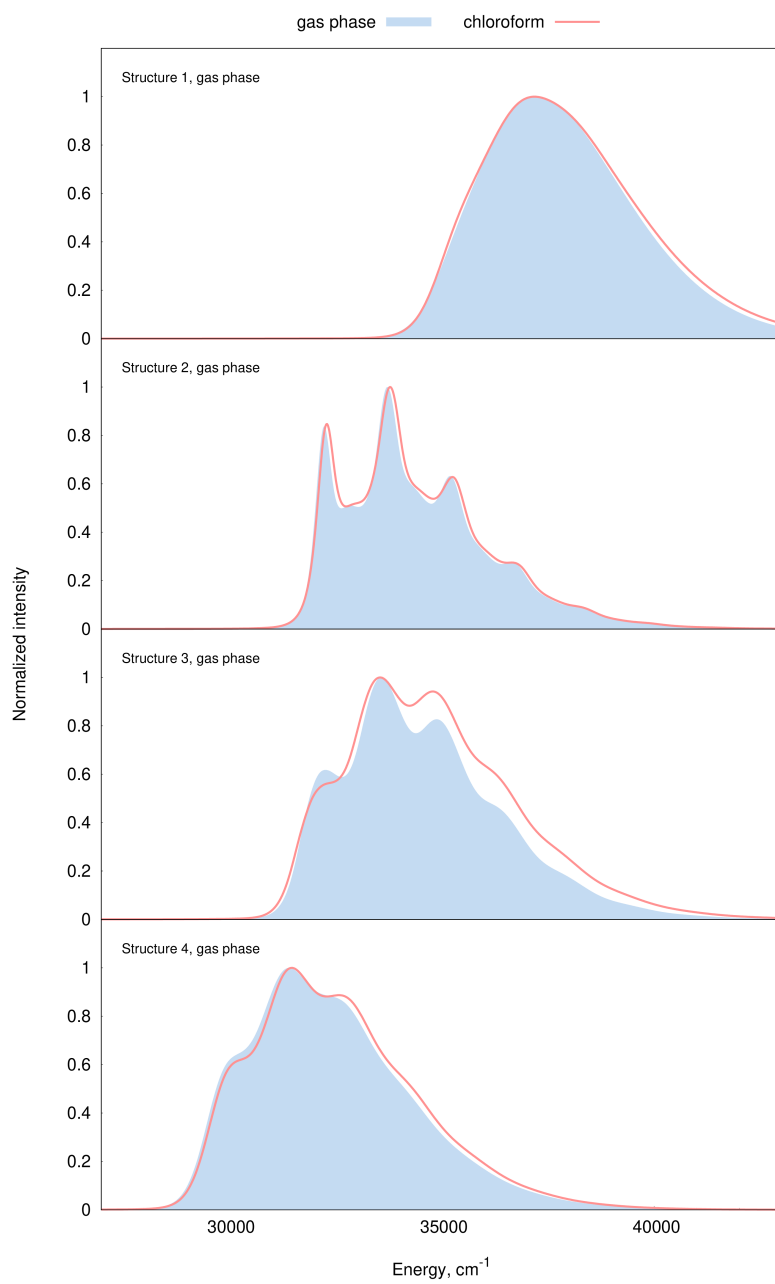

Figure S19: Comparison between the vibronic spectra in gas phase and chloroform (IEF-PCM) at 298 K. LC-BLYP electronic structure calculations, AH model using internal coordinates, HWHM was estimated using the PE model (see text for details).

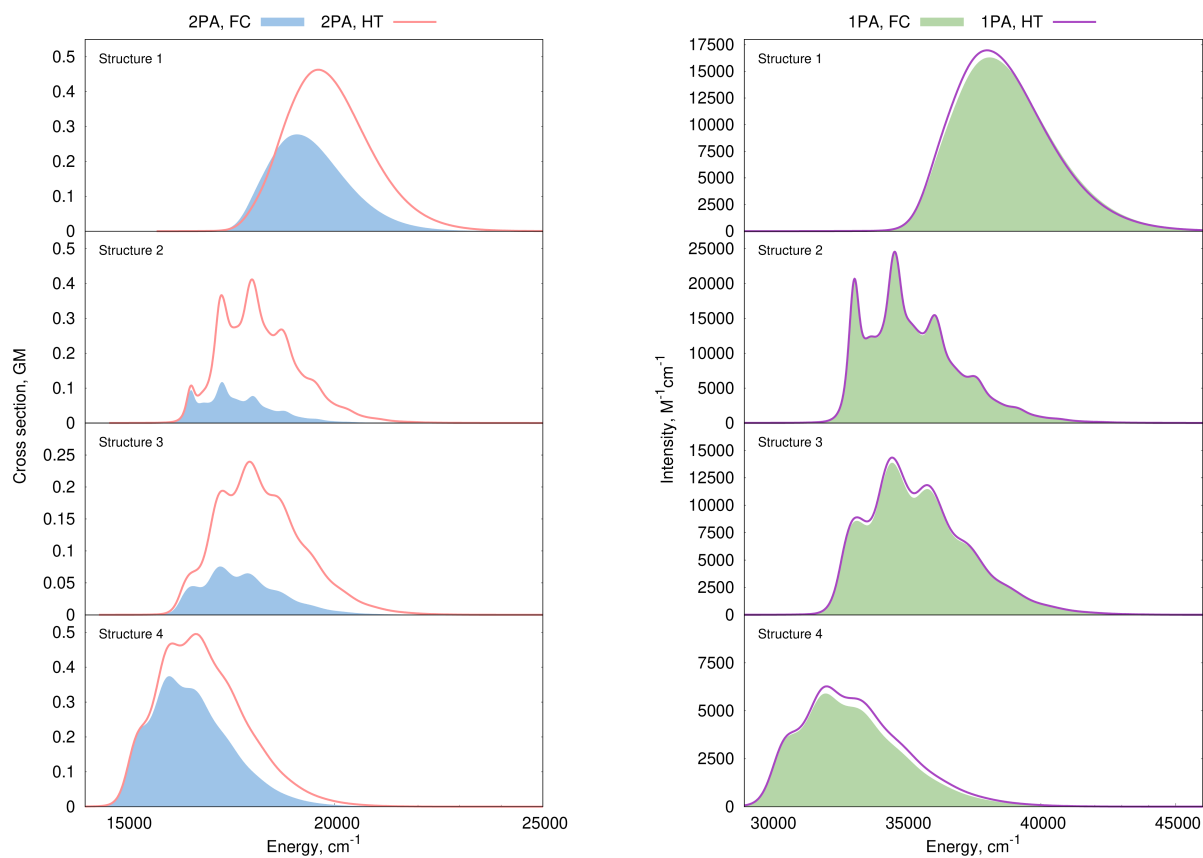

Figure S20: Comparison between FC and FC/HT models in simulating the vibrationally-resolved 1PA and 2PA  $S_0 \rightarrow S_1$  transitions based on LC-BLYP electronic structure calculations. The vibronic simulations use the AH PES model and rely on internal coordinates. Simulations were performed in the gas phase at 298 K using broadening estimated with the PE model. Spectra are shown in absolute values, not normalized



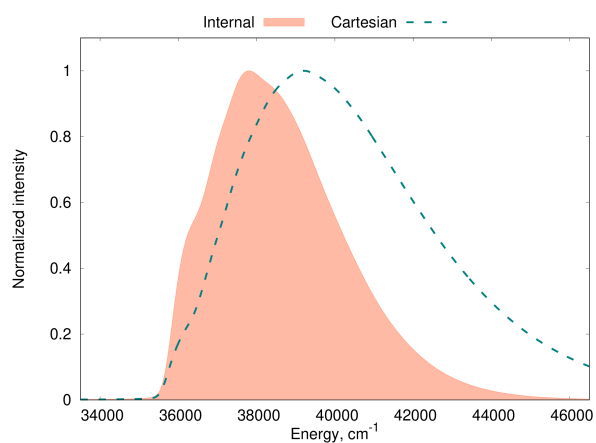

(a) Absorption spectra simulated using the AH vibrational space in the TD formalism, convoluted with Gaussian broadening (HWHM=100 cm<sup>-1</sup>).

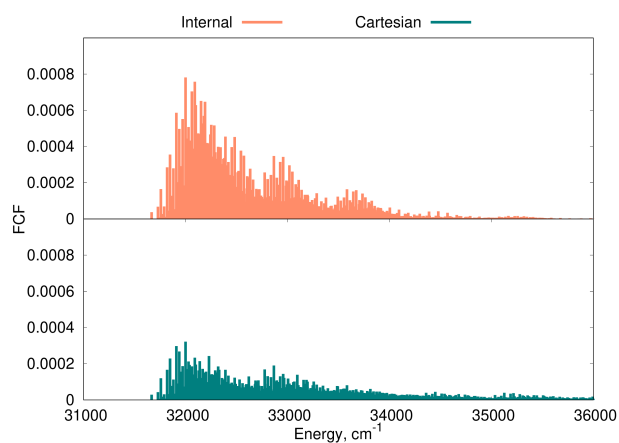

(b) Franck-Condon factor stick spectra simulated using the AH vibrational space in the TI formalism.

Figure S21: Comparison between Cartesian and internal coordinates for the computed vibronic structure for compound **1** in vacuum, 0 K.

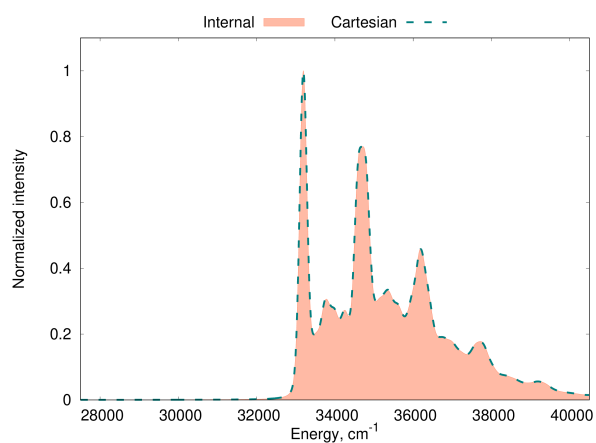

(a) Absorption spectra simulated using the AH vibrational space in the TD formalism, convoluted with Gaussian broadening (HWHM=100 cm<sup>-1</sup>).

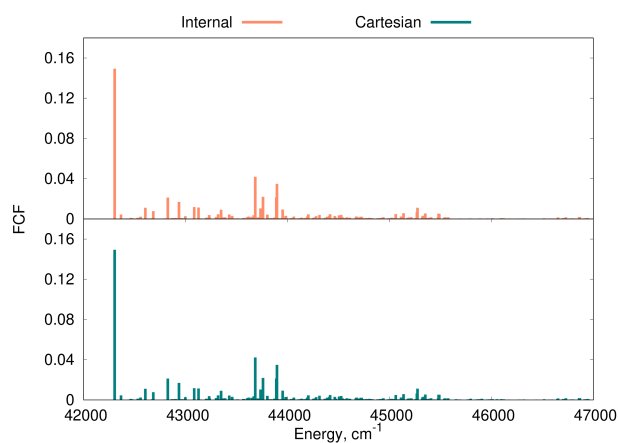

(b) Franck-Condon factor stick spectra simulated using the AH vibrational space in the TI formalism.

Figure S22: Comparison between Cartesian and internal coordinates for the computed vibronic structure for compound **2** in vacuum, 0 K.

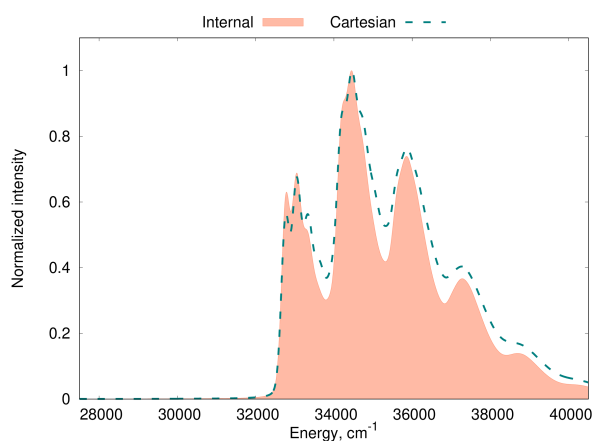

(a) Absorption spectra simulated using the AH vibrational space in the TD formalism, convoluted with Gaussian broadening (HWHM=100 cm<sup>-1</sup>).

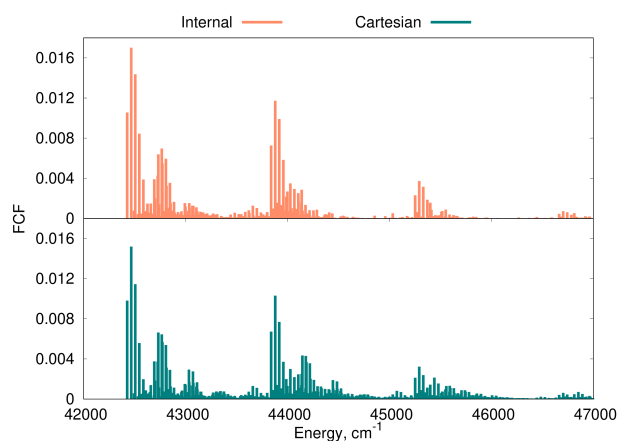

(b) Franck-Condon factor stick spectra simulated using the AH vibrational space in the TI formalism.

Figure S23: Comparison between Cartesian and internal coordinates for the computed vibronic structure for compound **3** in vacuum, 0 K.

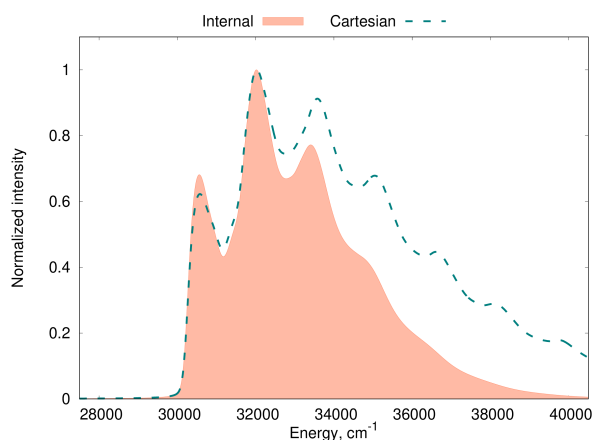

(a) Absorption spectra simulated using the AH vibrational space in the TD formalism, convoluted with Gaussian broadening (HWHM=100 cm<sup>-1</sup>).

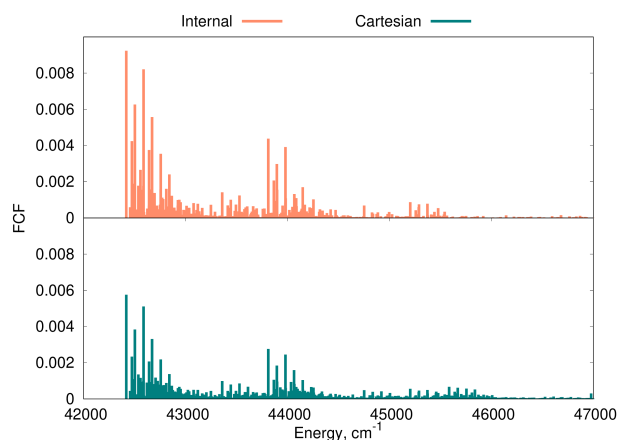

(b) Franck-Condon factor stick spectra simulated using the AH vibrational space in the TI formalism.

Figure S24: Comparison between Cartesian and internal coordinates for the computed vibronic structure for compound **4** in vacuum, 0 K.
